# Supplementary material for: Evidence for tankyrases as antineoplastic targets in lung cancer
Source: PubMed Central journal article supplement (PMC3644501; doi:10.1186/1471-2407-13-211), 2013-04-28
Supplement: 1471-2407-13-211-S2.pdf [file 1471-2407-13-211-S2.pdf]

## Supplemental Figure 2

|       | <u>ED1</u> |            |         |
|-------|------------|------------|---------|
|       | IWR-1 Exo  | IWR-1 Endo | XAV 939 |
| 100nM | n.s.       | n.s.       | n.s.    |
| 500nM | n.s.       | **         | **      |
| 1μM   | n.s.       | **         | **      |
| 5μM   | **         | **         | **      |
| 10μM  | **         | **         | **      |
| 25μM  | **         | **         | **      |
| 50μM  | **         | **         | **      |

|       | <u>ED1L</u> |            |         |
|-------|-------------|------------|---------|
|       | IWR-1 Exo   | IWR-1 Endo | XAV 939 |
| 100nM | n.s.        | n.s.       | n.s.    |
| 500nM | n.s.        | n.s.       | n.s.    |
| 1μM   | n.s.        | *          | n.s.    |
| 5μM   | **          | **         | n.s.    |
| 10μM  | **          | **         | *       |
| 25μM  | **          | **         | **      |
| 50μM  | **          | **         | **      |

|       | <u>ED2</u> |            |         |
|-------|------------|------------|---------|
|       | IWR-1 Exo  | IWR-1 Endo | XAV 939 |
| 100nM | n.s.       | **         | *       |
| 500nM | n.s.       | **         | **      |
| 1μM   | n.s.       | **         | **      |
| 5μM   | **         | **         | **      |
| 10μM  | **         | **         | **      |
| 25μM  | **         | **         | **      |
| 50μM  | **         | **         | **      |

|       | <u>A549</u> |            |         |
|-------|-------------|------------|---------|
|       | IWR-1 Exo   | IWR-1 Endo | XAV 939 |
| 100nM | n.s.        | n.s.       | n.s.    |
| 500nM | n.s.        | n.s.       | *       |
| 1μM   | n.s.        | **         | **      |
| 5μM   | n.s.        | **         | **      |
| 10μM  | **          | **         | **      |
| 25μM  | **          | **         | **      |
| 50μM  | **          | **         | **      |

|       | <u>Hop62</u> |            |         |
|-------|--------------|------------|---------|
|       | IWR-1 Exo    | IWR-1 Endo | XAV 939 |
| 100nM | n.s.         | n.s.       | n.s.    |
| 500nM | n.s.         | n.s.       | n.s.    |
| 1μM   | n.s.         | **         | n.s.    |
| 5μM   | n.s.         | **         | **      |
| 10μM  | n.s.         | **         | **      |
| 25μM  | n.s.         | **         | **      |
| 50μM  | **           | **         | **      |

|       | <u>H522</u> |            |         |
|-------|-------------|------------|---------|
|       | IWR-1 Exo   | IWR-1 Endo | XAV 939 |
| 100nM | n.s.        | n.s.       | n.s.    |
| 500nM | n.s.        | n.s.       | n.s.    |
| 1μM   | n.s.        | **         | n.s.    |
| 5μM   | n.s.        | **         | *       |
| 10μM  | n.s.        | **         | **      |
| 25μM  | n.s.        | **         | **      |
| 50μM  | **          | **         | **      |

|       | <u>C10</u> |            |         |
|-------|------------|------------|---------|
|       | IWR-1 Exo  | IWR-1 Endo | XAV 939 |
| 100nM | n.s.       | *          | n.s.    |
| 500nM | n.s.       | **         | **      |
| 1μM   | **         | **         | **      |
| 5μM   | **         | **         | **      |
| 10μM  | **         | **         | **      |
| 25μM  | **         | **         | **      |
| 50μM  | **         | **         | **      |

|       | <u>BEAS2B</u> |            |         |
|-------|---------------|------------|---------|
|       | IWR-1 Exo     | IWR-1 Endo | XAV 939 |
| 100nM | n.s.          | n.s.       | n.s.    |
| 500nM | n.s.          | n.s.       | n.s.    |
| 1μM   | n.s.          | n.s.       | n.s.    |
| 5μM   | *             | **         | *       |
| 10μM  | *             | **         | *       |
| 25μM  | n.s.          | **         | **      |
| 50μM  | **            | **         | **      |

### Supplemental Figure 2:

Statistical analysis of figure 2 panels A, B, and C. Percent growth at each drug dosage was compared to vehicle control via ANOVA with Dunnett's multiple comparisons post-test in GraphPad InStat. (\*  $p < 0.05$ , \*\*  $p < 0.01$ )
