# Supplementary material for: Evidence for tankyrases as antineoplastic targets in lung cancer
Source: PubMed Central journal article supplement (PMC3644501; doi:10.1186/1471-2407-13-211), 2013-04-28
Supplement: 1471-2407-13-211-S4.pdf [file 1471-2407-13-211-S4.pdf]

# Supplemental Figure 4

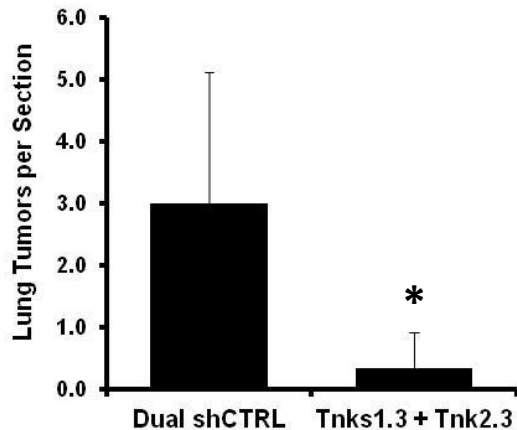

## Supplemental Figure 4

*In vivo* tumor formation from injection of syngeneic FVB mice with ED1 cells transduced with dual TNKS knockdown or dual control,  $N = 5$  and  $3$ , respectively. Error bars represent mean  $\pm$  S.D. (\*  $p < 0.05$  by one-tailed T-test)
